# Supplementary material for: Two-dimensional hydrogenated molybdenum and tungsten dinitrides MN2H2(M = Mo, W) as novel quantum spin hall insulators with high stability
Source: Royal Society of Chemistry journal article supplement (doi:10.1039/c6nr08923b), 2016-12-07
Supplement: c6nr08923b1.pdf [file c6nr08923b1.pdf]

## Electronic Supplementary Information

# Novel Quantum Spin Hall Insulators in Two-dimensional Hydrogenated Molybdenum and Tungsten Dinitride $MN_2H_2$ (M = Mo, W) with High Stability

Peng-Fei Liu,<sup>a,c</sup> Liujiang Zhou,<sup>\*,b</sup> Thomas Frauenheim,<sup>b</sup> Li-Ming Wu<sup>\*,a</sup>

*<sup>a</sup>State Key Laboratory of Structural Chemistry, Fujian Institute of Research on the  
Structure of Matter, Chinese Academy of Sciences, Fuzhou, Fujian 350002, People's  
Republic of China*

*<sup>b</sup>Bremen Center for Computational Materials Science, University of Bremen, Am  
Falturm 1, 28359 Bremen, Germany*

*<sup>c</sup>University of Chinese Academy of Sciences, Beijing 100039, People's Republic of China*

# **SURPOTING INFORMATION**

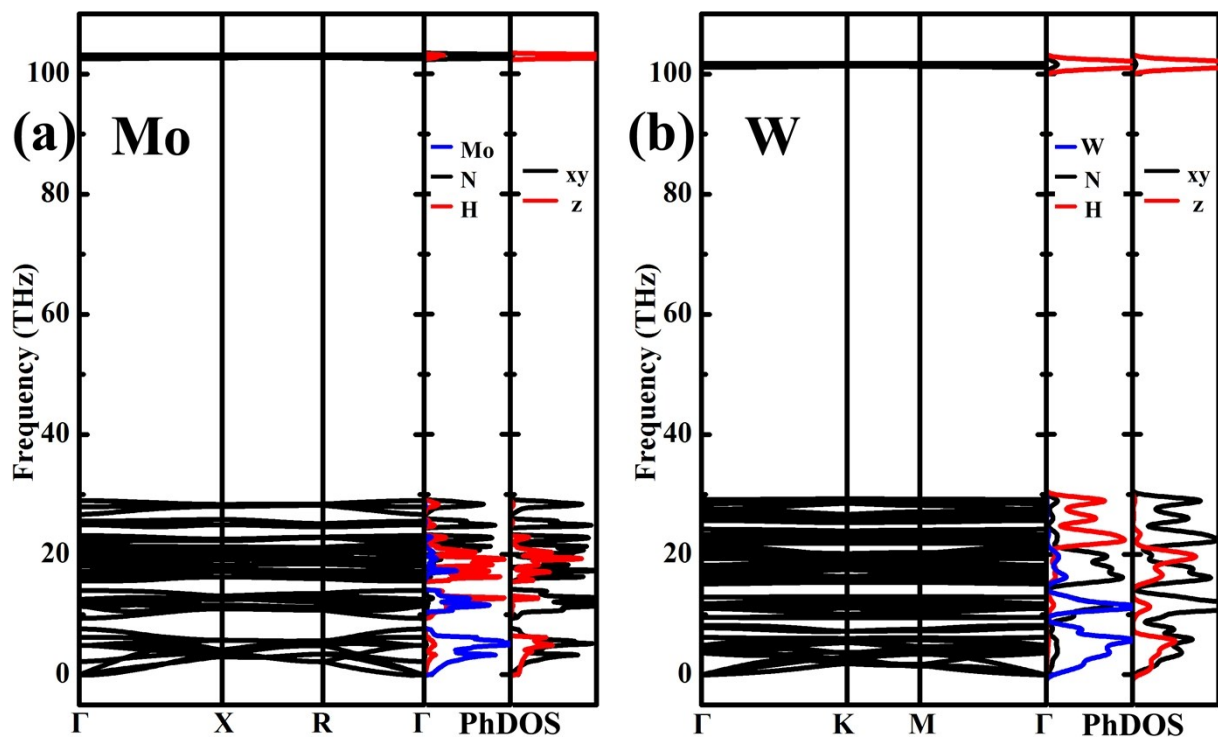

**Figure S1.** The phonon spectra and projected phonon density of states (PhDOS) for (a) g-MoN<sub>2</sub>H<sub>2</sub> and (b) g-WN<sub>2</sub>H<sub>2</sub> monolayers.

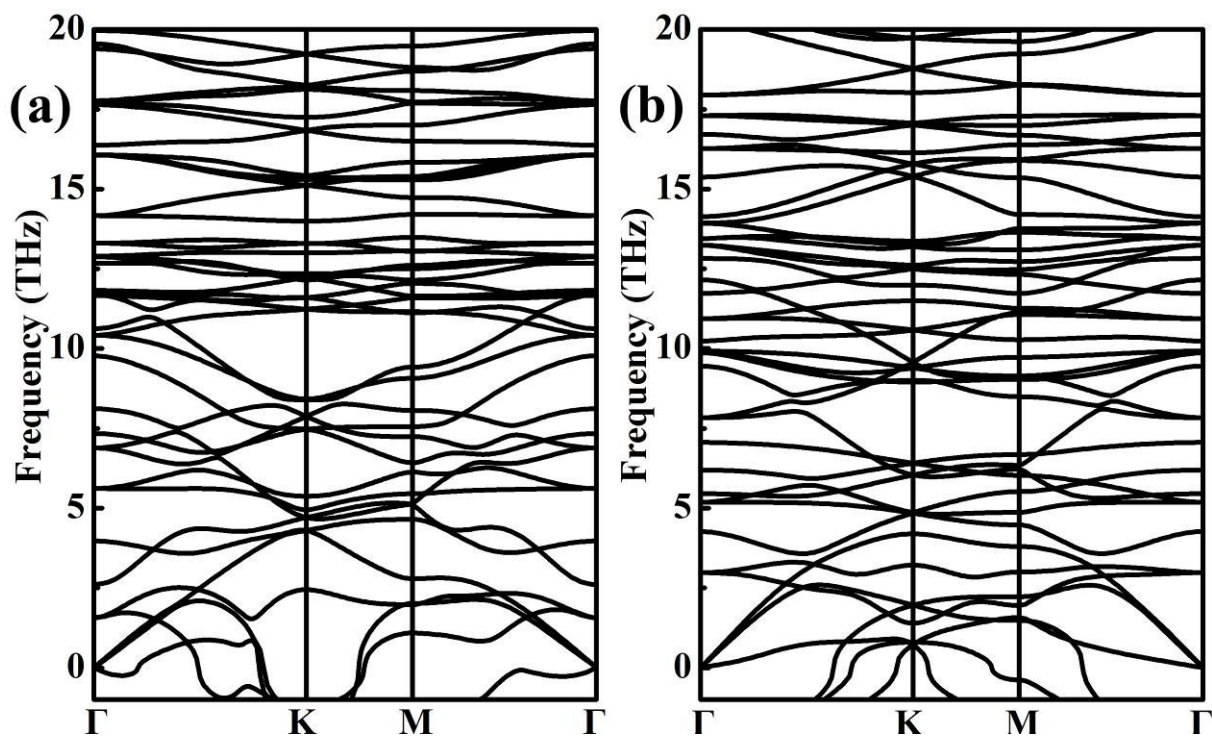

**Figure S2.** The phonon spectra for (a) g-MoN<sub>2</sub> and (b) g-WN<sub>2</sub> monolayers.

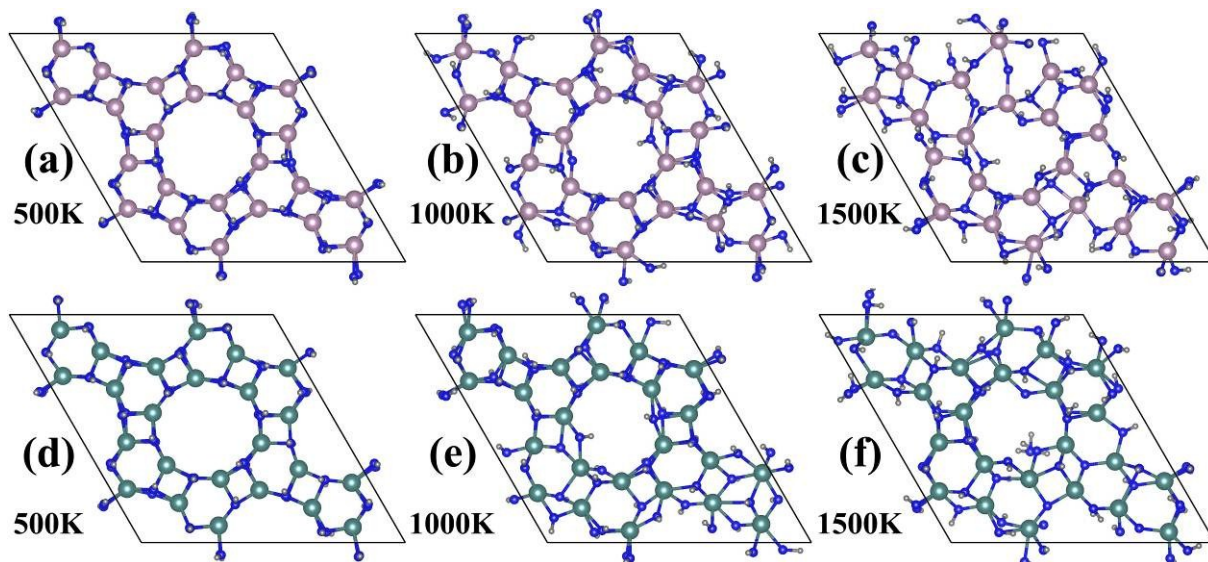

**Figure S3.** The top views of monolayers after the *ab-initio* molecular dynamics simulation: (a) 500 K, (b) 1000 K and (c) 1500 K for g-MoN<sub>2</sub>H<sub>2</sub> monolayer; (d) 500 K, (e) 1000 K and (f) 1500 K for g-WN<sub>2</sub>H<sub>2</sub> monolayer.

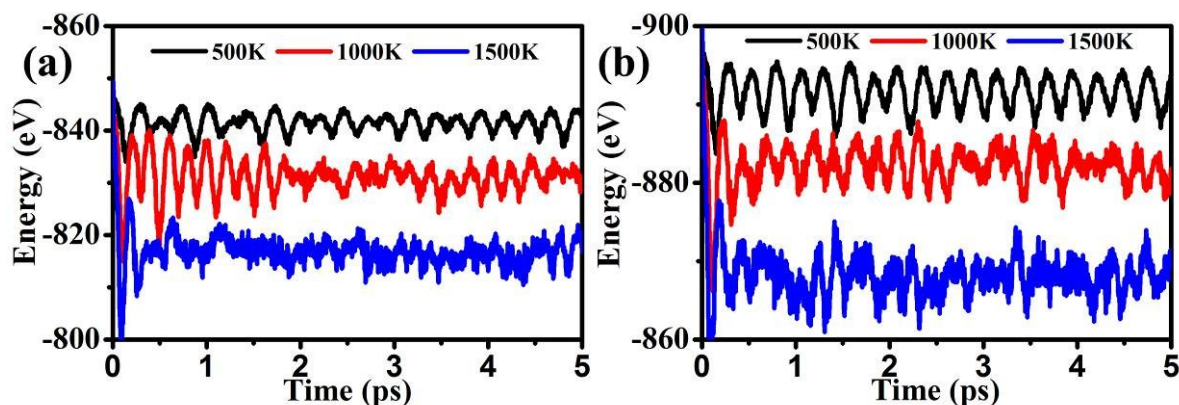

**Figure S4.** Energy fluctuations with respect to time in *AIMD* simulations at 500 K, 1000 K and 1500K for the (a) g-MoN<sub>2</sub>H<sub>2</sub> and (b) g-WN<sub>2</sub>H<sub>2</sub> monolayers, respectively.

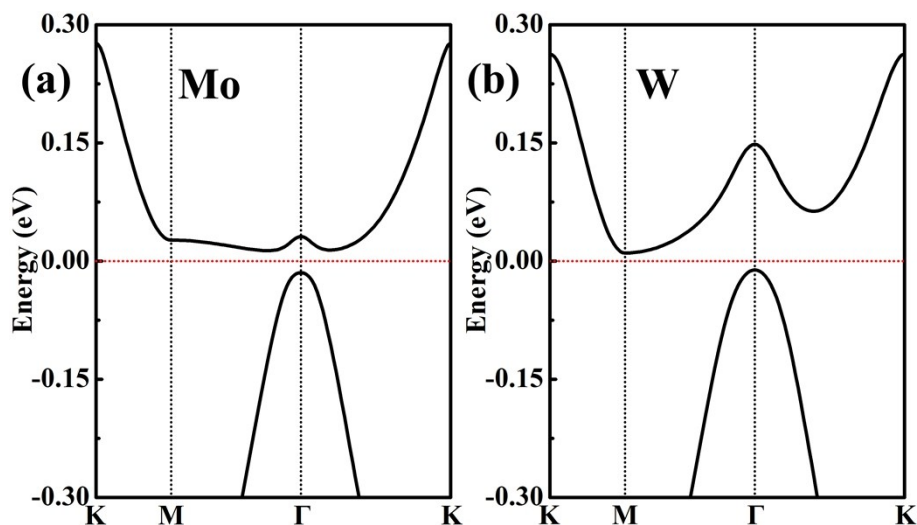

**Figure S5.** The zoom-in band structures for (a) g-MoN<sub>2</sub>H<sub>2</sub> and (b) g-WN<sub>2</sub>H<sub>2</sub> monolayers with SOC.





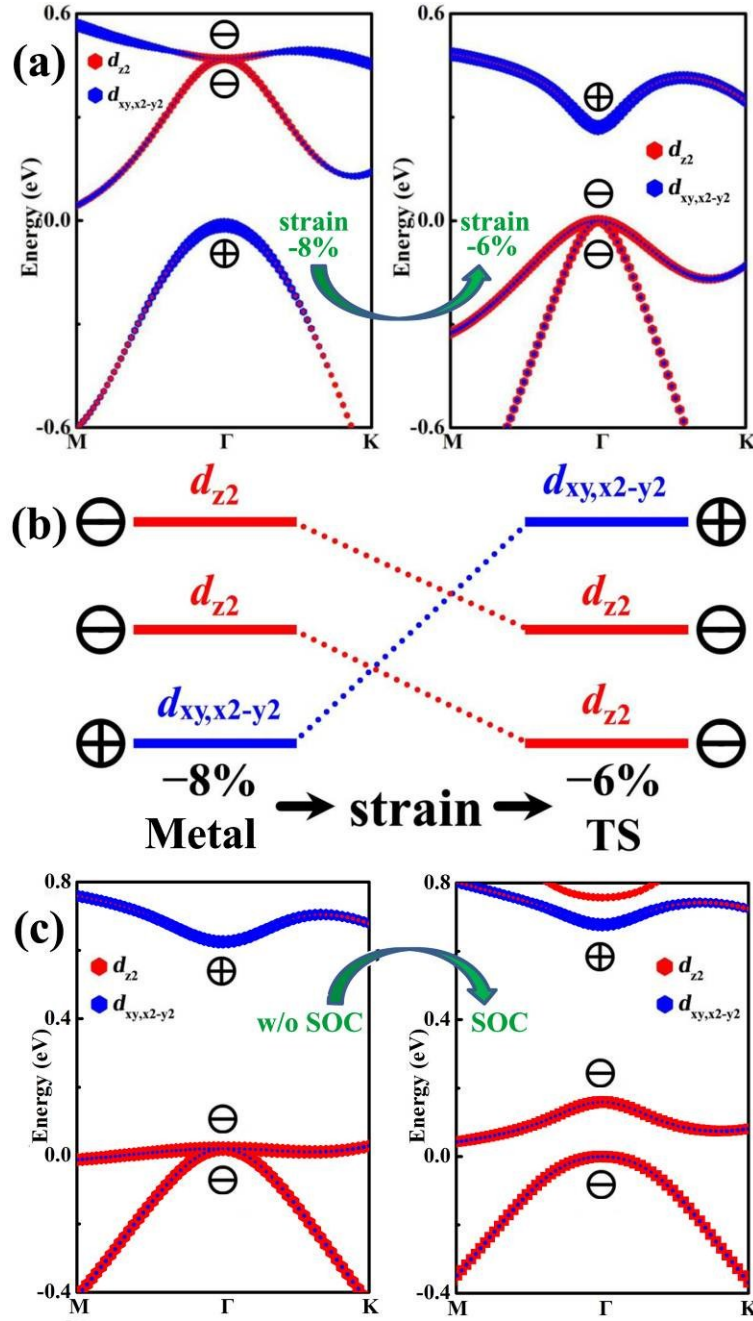

**Figure S8.** (a) Selected orbital-resolved band structures for g-WN<sub>2</sub>H<sub>2</sub> monolayers under strain -8% and -6%. The red hexagonal dots represent the contributions from the W  $d_{z2}$  atomic orbitals; the blue hexagonal dots represent the contribution from W  $d_{xy,x2-y2}$  atomic orbitals. (b) Schematic illustration of the band evolution from the atomic orbitals  $d_{z2}$  and  $d_{xy,x2-y2}$  of the W atom around the Fermi level at the  $\Gamma$  point for g-WN<sub>2</sub>H<sub>2</sub> monolayer. (c) Zoom-in orbital-resolved band structures for g-WN<sub>2</sub>H<sub>2</sub> monolayers with and without SOC. Parity values are presented near the various orbitals.

**Table S1.** The contributions of the five  $d$  orbitals to the VBM and CBM based on PBE and HSE06 for g-MN<sub>2</sub>H<sub>2</sub> sheets.

| Comp.                             | $d_{xy}$ (HSE06/PBE) | $d_{yz}$ | $d_{z2}$ (HSE06/PBE) | $d_{xz}$ | $d_{x2-y2}$ (HSE06/PBE) | Total (HSE06/PBE) |     |
|-----------------------------------|----------------------|----------|----------------------|----------|-------------------------|-------------------|-----|
| g-MoN <sub>2</sub> H <sub>2</sub> | 0.055/0.062          | 0        | 0.645/0.618          | 0        | 0.056/0.063             | 0.855/0.854       | CBM |
|                                   | 0.056/0.063          | 0        | 0.645/0.618          | 0        | 0.055/0.062             | 0.855/0.854       | VBM |
| g-WN <sub>2</sub> H <sub>2</sub>  | 0.055/0.058          | 0        | 0.613/0.612          | 0        | 0.055/0.060             | 0.835/0.829       | CBM |
|                                   | 0.055/0.060          | 0        | 0.613/0.612          | 0        | 0.055/0.058             | 0.835/0.829       | VBM |
